# Supplementary material
Source: publisher figshare collection journal article supplement (https://acs.figshare.com/ndownloader/files/6311304)
Supplement: Supplementary file 1 [file 6311304]

data_Pred295KMonoRietveld

loop_
_publ_author_name
Ph. Negrier
Ph. Espeau

_audit_creation_date              2016-06-30
_audit_creation_method            'Materials Studio'
_chemical_name_common             ? 
_chemical_melting_point           ? 
_chemical_formula_moiety          'C21 H28 O5'
_chemical_formula_sum             'C21 H28 O5'
_chemical_formula_weight          360.43
_symmetry_space_group_name_H-M    'P21'
_symmetry_Int_Tables_number       4
_symmetry_cell_setting            monoclinic

loop_
_symmetry_equiv_pos_site_id
_symmetry_equiv_pos_as_xyz
   1 x,y,z
   2 -x,1/2+y,-z
 
_cell_length_a                           6.3470(9)
_cell_length_b                         12.9980(16)
_cell_length_c                         10.9844(15)
_cell_angle_alpha                               90
_cell_angle_beta                         91.176(9)
_cell_angle_gamma                               90
_cell_volume                              906.0(2)
_cell_formula_units_Z                    2
_cell_measurement_temperature     295(1) 
_cell_measurement_theta_min       3.0
_cell_measurement_theta_max       27.5
_exptl_crystal_density_diffrn     1.321
_exptl_crystal_description        'Powder Sample'
_exptl_crystal_colour               'White'
_diffrn_ambient_temperature       295(1)
_diffrn_radiation_wavelength      1.540562 
_diffrn_radiation_type            CuK\a~1~
_diffrn_radiation_source          'fine-focus sealed tube' 
_diffrn_radiation_monochromator   'curved quartz' 
_diffrn_measurement_device_type   'Inel CPS120' 

loop_
_atom_site_label
_atom_site_type_symbol
_atom_site_thermal_displace_type
_atom_site_fract_x
_atom_site_fract_y
_atom_site_fract_z
_atom_site_occupancy
_atom_site_U_iso_or_equiv
_atom_site_calc_flag
_atom_site_refinement_flags
O1 O Uiso 0.8994(9) 0.3959(6) 1.2763(6) 1.000 0.0500 . .
O2 O Uiso 0.7769(12) 0.38750(6) 0.6548(5) 1.000 0.0500 . .
O3 O Uiso 1.0631(9) 0.7549(4) 0.5362(6) 1.000 0.0500 . .
O4 O Uiso 0.7578(8) 0.7104(4) 0.2849(6) 1.000 0.0500 . .
O5 O Uiso 1.0977(11) 0.6278(5) 0.1949(6) 1.000 0.0500 . .
C1 C Uiso 0.8496(8) 0.4101(4) 1.1680(5) 1.000 0.0500 . .
C2 C Uiso 0.6829(8) 0.4813(3) 1.1328(5) 1.000 0.0500 . .
C3 C Uiso 0.6198(7) 0.4951(3) 1.0162(5) 1.000 0.0500 . .
C4 C Uiso 0.4501(9) 0.5702(4) 0.9821(6) 1.000 0.0500 . .
C5 C Uiso 0.5295(10) 0.6461(3) 0.8861(6) 1.000 0.0500 . .
C6 C Uiso 0.6179(6) 0.5912(2) 0.7755(5) 1.000 0.0500 . .
C7 C Uiso 0.7121(8) 0.66842(11) 0.6865(6) 1.000 0.0500 . .
C8 C Uiso 0.5735(11) 0.7566(3) 0.6383(7) 1.000 0.0500 . .
C9 C Uiso 0.6828(11) 0.7919(3) 0.5209(6) 1.000 0.0500 . .
C10 C Uiso 0.8620(7) 0.71503(19) 0.4967(6) 1.000 0.0500 . .
C11 C Uiso 0.7964(6) 0.61717(13) 0.5709(5) 1.000 0.0500 . .
C12 C Uiso 0.9756(6) 0.5449(2) 0.6110(6) 1.000 0.0500 . .
C13 C Uiso 0.9073(8) 0.46563(16) 0.7070(6) 1.000 0.0500 . .
C14 C Uiso 0.7918(5) 0.51444(9) 0.8148(5) 1.000 0.0500 . .
C15 C Uiso 0.7121(7) 0.43485(17) 0.9123(5) 1.000 0.0500 . .
C16 C Uiso 0.8919(9) 0.3680(3) 0.9538(6) 1.000 0.0500 . .
C17 C Uiso 0.9550(8) 0.3565(4) 1.0697(6) 1.000 0.0500 . .
C18 C Uiso 0.5362(10) 0.3612(3) 0.8639(5) 1.000 0.0500 . .
C19 C Uiso 0.6227(8) 0.5604(3) 0.4976(5) 1.000 0.0500 . .
C20 C Uiso 0.8920(7) 0.6915(3) 0.3614(6) 1.000 0.0500 . .
C21 C Uiso 1.0917(9) 0.6388(4) 0.3223(6) 1.000 0.0500 . .
H21 H Uiso 0.8284(15) 0.36729(11) 0.5902(6) 1.000 0.0500 . .
H31 H Uiso 1.0489(12) 0.7887(3) 0.5996(6) 1.000 0.0500 . .
H2 H Uiso 0.6162(11) 0.5192(4) 1.1939(5) 1.000 0.0500 . .
H4A H Uiso 0.4072(12) 0.6082(5) 1.0546(6) 1.000 0.0500 . .
H4B H Uiso 0.3270(7) 0.5331(6) 0.9495(6) 1.000 0.0500 . .
H5 H Uiso 0.9781(12) 0.6376(5) 0.1651(6) 1.000 0.0500 . .
H5A H Uiso 0.4130(12) 0.6907(5) 0.8597(7) 1.000 0.0500 . .
H5B H Uiso 0.6395(13) 0.6896(2) 0.9230(6) 1.000 0.0500 . .
H6 H Uiso 0.5027(5) 0.5531(4) 0.7334(5) 1.000 0.0500 . .
H7 H Uiso 0.8345(10) 0.70048(7) 0.7290(6) 1.000 0.0500 . .
H8A H Uiso 0.5677(15) 0.8128(3) 0.6976(7) 1.000 0.0500 . .
H8B H Uiso 0.4299(10) 0.7326(5) 0.6202(7) 1.000 0.0500 . .
H9A H Uiso 0.5818(10) 0.7926(4) 0.4522(7) 1.000 0.0500 . .
H9B H Uiso 0.7400(14) 0.86152(19) 0.5315(7) 1.000 0.0500 . .
H12A H Uiso 1.0923(5) 0.5860(4) 0.6449(6) 1.000 0.0500 . .
H12B H Uiso 1.0273(9) 0.5083(3) 0.5396(6) 1.000 0.0500 . .
H13 H Uiso 1.0363(9) 0.4321(3) 0.7400(6) 1.000 0.0500 . .
H14 H Uiso 0.8996(6) 0.5564(2) 0.8582(5) 1.000 0.0500 . .
H16 H Uiso 0.9654(11) 0.3315(3) 0.8940(7) 1.000 0.0500 . .
H17 H Uiso 1.0695(10) 0.3130(6) 1.0883(7) 1.000 0.0500 . .
H18A H Uiso 0.4645(10) 0.3305(4) 0.9321(5) 1.000 0.0500 . .
H18B H Uiso 0.5987(14) 0.3074(2) 0.8152(5) 1.000 0.0500 . .
H18C H Uiso 0.4357(9) 0.3997(5) 0.8142(5) 1.000 0.0500 . .
H19A H Uiso 0.5496(9) 0.5133(4) 0.5507(5) 1.000 0.0500 . .
H19B H Uiso 0.6857(10) 0.5221(3) 0.4319(5) 1.000 0.0500 . .
H19C H Uiso 0.5233(7) 0.6100(5) 0.4640(6) 1.000 0.0500 . .
H21A H Uiso 1.2138(7) 0.6791(6) 0.3505(6) 1.000 0.0500 . .
H21B H Uiso 1.1008(10) 0.5707(4) 0.3605(6) 1.000 0.0500 . .

loop_
_geom_bond_atom_site_label_1
_geom_bond_atom_site_label_2
_geom_bond_distance
_geom_bond_site_symmetry_1
_geom_bond_site_symmetry_2
_geom_bond_publ_flag
 O1      C1         1.238(9)                     .       .                   yes
 O2      C13        1.423(6)                     .       .                   yes
 O3      C10        1.436(7)                     .       .                   yes
 O4      C20        1.209(8)                     .       .                   yes
 O5      C21        1.408(9)                     .       .                   yes
 O2      H21        0.830(9)                     .       .                   no
 O3      H31        0.830(9)                     .       .                   no
 O5      H5        0.830(10)                     .       .                   no
 C1      C2         1.452(7)                     .       .                   no
 C1      C17        1.459(8)                     .       .                   no
 C2      C3         1.346(8)                     .       .                   no
 C3      C15        1.512(7)                     .       .                   no
 C3      C4         1.496(7)                     .       .                   no
 C4      C5         1.537(8)                     .       .                   no
 C5      C6         1.526(8)                     .       .                   no
 C6      C7         1.531(6)                     .       .                   no
 C6      C14        1.543(5)                     .       .                   no
 C7      C11        1.540(8)                     .       .                   no
 C7      C8         1.533(7)                     .       .                   no
 C8      C9        1.546(10)                     .       .                   no
 C9      C10        1.541(7)                     .       .                   no
 C10     C11        1.572(5)                     .       .                   no
 C10     C20        1.533(9)                     .       .                   no
 C11     C12        1.533(5)                     .       .                   no
 C11     C19        1.540(6)                     .       .                   no
 C12     C13        1.543(7)                     .       .                   no
 C13     C14        1.542(7)                     .       .                   no
 C14     C15        1.580(6)                     .       .                   no
 C15     C16        1.498(7)                     .       .                   no
 C15     C18        1.556(7)                     .       .                   no
 C16     C17        1.335(9)                     .       .                   no
 C20     C21        1.511(7)                     .       .                   no
 C2      H2         0.940(8)                     .       .                   no
 C4      H4A        0.980(9)                     .       .                   no
 C4      H4B        0.980(8)                     .       .                   no
 C5      H5A        0.979(9)                     .       .                   no
 C5      H5B        0.980(9)                     .       .                   no
 C6      H6         0.990(6)                     .       .                   no
 C7      H7         0.990(8)                     .       .                   no
 C8      H8A        0.980(8)                     .       .                   no
 C8      H8B        0.980(9)                     .       .                   no
 C9      H9A       0.980(10)                     .       .                   no
 C9      H9B        0.981(6)                     .       .                   no
 C12     H12A       0.981(6)                     .       .                   no
 C12     H12B       0.980(8)                     .       .                   no
 C13     H13        0.990(7)                     .       .                   no
 C14     H14        0.990(5)                     .       .                   no
 C16     H16        0.942(9)                     .       .                   no
 C17     H17        0.940(9)                     .       .                   no
 C18     H18A       0.970(8)                     .       .                   no
 C18     H18B       0.970(7)                     .       .                   no
 C18     H18C       0.970(8)                     .       .                   no
 C19     H19A       0.970(7)                     .       .                   no
 C19     H19B       0.970(7)                     .       .                   no
 C19     H19C       0.970(7)                     .       .                   no
 C21     H21A       0.980(8)                     .       .                   no
 C21     H21B       0.981(8)                     .       .                   no
 
loop_
_geom_angle_atom_site_label_1
_geom_angle_atom_site_label_2
_geom_angle_atom_site_label_3
_geom_angle
_geom_angle_site_symmetry_1
_geom_angle_site_symmetry_2
_geom_angle_site_symmetry_3
_geom_angle_publ_flag
 C13     O2      H21        109.5(8)             .       .       .           no
 C10     O3      H31        109.5(8)             .       .       .           no
 C21     O5      H5         109.5(8)             .       .       .           no
 O1      C1      C2         121.4(5)             .       .       .           yes
 O1      C1      C17        121.9(5)             .       .       .           yes
 C2      C1      C17        116.7(5)             .       .       .           no
 C1      C2      C3         122.6(5)             .       .       .           no
 C4      C3      C15        115.9(5)             .       .       .           no
 C2      C3      C15        122.5(4)             .       .       .           no
 C2      C3      C4         121.6(5)             .       .       .           no
 C3      C4      C5         110.3(5)             .       .       .           no
 C4      C5      C6         112.2(3)             .       .       .           no
 C5      C6      C7         110.9(3)             .       .       .           no
 C5      C6      C14        110.6(4)             .       .       .           no
 C7      C6      C14        108.4(3)             .       .       .           no
 C6      C7      C11        112.9(2)             .       .       .           no
 C6      C7      C8         118.8(4)             .       .       .           no
 C8      C7      C11        104.2(5)             .       .       .           no
 C7      C8      C9         104.2(5)             .       .       .           no
 C8      C9      C10        107.3(4)             .       .       .           no
 C9      C10     C11        103.4(4)             .       .       .           no
 C9      C10     C20        113.8(5)             .       .       .           no
 C11     C10     C20        112.4(3)             .       .       .           no
 O3      C10     C9         111.6(4)             .       .       .           yes
 O3      C10     C11        112.3(4)             .       .       .           yes
 O3      C10     C20        103.7(4)             .       .       .           yes
 C7      C11     C10        100.2(3)             .       .       .           no
 C7      C11     C12        107.3(4)             .       .       .           no
 C7      C11     C19        112.4(4)             .       .       .           no
 C12     C11     C19        112.1(3)             .       .       .           no
 C10     C11     C12        116.2(3)             .       .       .           no
 C10     C11     C19        108.1(4)             .       .       .           no
 C11     C12     C13        112.9(4)             .       .       .           no
 O2      C13     C12        111.7(5)             .       .       .           yes
 O2      C13     C14        108.7(4)             .       .       .           yes
 C12     C13     C14        113.3(2)             .       .       .           no
 C13     C14     C15        114.5(2)             .       .       .           no
 C6      C14     C13        113.6(4)             .       .       .           no
 C6      C14     C15        112.1(3)             .       .       .           no
 C3      C15     C16        112.0(5)             .       .       .           no
 C14     C15     C18        114.1(4)             .       .       .           no
 C3      C15     C18        106.9(4)             .       .       .           no
 C14     C15     C16        109.5(4)             .       .       .           no
 C3      C15     C14        107.9(2)             .       .       .           no
 C16     C15     C18        106.5(3)             .       .       .           no
 C15     C16     C17        124.5(5)             .       .       .           no
 C1      C17     C16        121.3(5)             .       .       .           no
 O4      C20     C10        122.2(5)             .       .       .           yes
 O4      C20     C21        118.5(6)             .       .       .           yes
 C10     C20     C21        119.2(5)             .       .       .           no
 O5      C21     C20        111.6(5)             .       .       .           yes
 C1      C2      H2         118.7(6)             .       .       .           no
 C3      C2      H2         118.7(6)             .       .       .           no
 C3      C4      H4A        109.6(7)             .       .       .           no
 C3      C4      H4B        109.6(6)             .       .       .           no
 C5      C4      H4A        109.5(6)             .       .       .           no
 C5      C4      H4B        109.6(7)             .       .       .           no
 H4A     C4      H4B        108.2(8)             .       .       .           no
 C4      C5      H5A        109.1(7)             .       .       .           no
 C4      C5      H5B        109.1(7)             .       .       .           no
 C6      C5      H5A        109.2(7)             .       .       .           no
 C6      C5      H5B        109.2(7)             .       .       .           no
 H5A     C5      H5B        108.0(6)             .       .       .           no
 C5      C6      H6         109.0(5)             .       .       .           no
 C7      C6      H6         108.9(6)             .       .       .           no
 C14     C6      H6         108.9(4)             .       .       .           no
 C6      C7      H7         106.7(6)             .       .       .           no
 C8      C7      H7         106.7(3)             .       .       .           no
 C11     C7      H7         106.8(6)             .       .       .           no
 C7      C8      H8A        110.9(8)             .       .       .           no
 C7      C8      H8B        110.9(5)             .       .       .           no
 C9      C8      H8A        110.9(6)             .       .       .           no
 C9      C8      H8B        110.9(8)             .       .       .           no
 H8A     C8      H8B        109.0(9)             .       .       .           no
 C8      C9      H9A        110.3(7)             .       .       .           no
 C8      C9      H9B        110.2(7)             .       .       .           no
 C10     C9      H9A        110.3(6)             .       .       .           no
 C10     C9      H9B        110.2(7)             .       .       .           no
 H9A     C9      H9B        108.5(7)             .       .       .           no
 C11     C12     H12A       109.0(4)             .       .       .           no
 C11     C12     H12B       109.1(6)             .       .       .           no
 C13     C12     H12A       109.0(6)             .       .       .           no
 C13     C12     H12B       109.1(4)             .       .       .           no
 H12A    C12     H12B       107.8(6)             .       .       .           no
 O2      C13     H13        107.7(4)             .       .       .           no
 C12     C13     H13        107.6(5)             .       .       .           no
 C14     C13     H13        107.6(6)             .       .       .           no
 C6      C14     H14        105.2(2)             .       .       .           no
 C13     C14     H14        105.2(4)             .       .       .           no
 C15     C14     H14        105.2(5)             .       .       .           no
 C15     C16     H16        117.7(7)             .       .       .           no
 C17     C16     H16        117.7(7)             .       .       .           no
 C1      C17     H17        119.4(8)             .       .       .           no
 C16     C17     H17        119.4(8)             .       .       .           no
 C15     C18     H18A       109.5(6)             .       .       .           no
 C15     C18     H18B       109.5(7)             .       .       .           no
 C15     C18     H18C       109.5(5)             .       .       .           no
 H18A    C18     H18B       109.4(6)             .       .       .           no
 H18A    C18     H18C       109.5(8)             .       .       .           no
 H18B    C18     H18C       109.5(7)             .       .       .           no
 C11     C19     H19A       109.5(6)             .       .       .           no
 C11     C19     H19B       109.5(6)             .       .       .           no
 C11     C19     H19C       109.5(5)             .       .       .           no
 H19A    C19     H19B       109.5(6)             .       .       .           no
 H19A    C19     H19C       109.5(7)             .       .       .           no
 H19B    C19     H19C       109.5(7)             .       .       .           no
 O5      C21     H21A       109.3(7)             .       .       .           no
 O5      C21     H21B       109.3(7)             .       .       .           no
 C20     C21     H21A       109.3(6)             .       .       .           no
 C20     C21     H21B       109.3(6)             .       .       .           no
 H21A    C21     H21B       107.9(8)             .       .       .           no
 
loop_
_geom_torsion_atom_site_label_1
_geom_torsion_atom_site_label_2
_geom_torsion_atom_site_label_3
_geom_torsion_atom_site_label_4
_geom_torsion
_geom_torsion_site_symmetry_1
_geom_torsion_site_symmetry_2
_geom_torsion_site_symmetry_3
_geom_torsion_site_symmetry_4
_geom_torsion_publ_flag
 O1      C1      C2      C3        -177.2(6)     .       .       .       .   no
 C17     C1      C2      C3           2.8(7)     .       .       .       .   no
 O1      C1      C17     C16        176.1(6)     .       .       .       .   no
 C2      C1      C17     C16         -3.9(7)     .       .       .       .   no
 C1      C2      C3      C4        -179.0(4)     .       .       .       .   no
 C1      C2      C3      C15          2.2(7)     .       .       .       .   no
 C2      C3      C4      C5         125.3(5)     .       .       .       .   no
 C15     C3      C4      C5         -55.8(6)     .       .       .       .   no
 C2      C3      C15     C14       -126.2(4)     .       .       .       .   no
 C2      C3      C15     C16         -5.6(6)     .       .       .       .   no
 C2      C3      C15     C18        110.7(5)     .       .       .       .   no
 C4      C3      C15     C14         54.9(5)     .       .       .       .   no
 C4      C3      C15     C16        175.5(4)     .       .       .       .   no
 C4      C3      C15     C18        -68.3(5)     .       .       .       .   no
 C3      C4      C5      C6          54.0(6)     .       .       .       .   no
 C4      C5      C6      C7        -175.3(4)     .       .       .       .   no
 C4      C5      C6      C14        -55.0(5)     .       .       .       .   no
 C5      C6      C7      C8         -55.4(6)     .       .       .       .   no
 C5      C6      C7      C11       -177.9(4)     .       .       .       .   no
 C14     C6      C7      C8        -177.1(5)     .       .       .       .   no
 C14     C6      C7      C11         60.4(5)     .       .       .       .   no
 C5      C6      C14     C13       -173.0(3)     .       .       .       .   no
 C5      C6      C14     C15         55.3(4)     .       .       .       .   no
 C7      C6      C14     C13        -51.2(4)     .       .       .       .   no
 C7      C6      C14     C15        177.1(4)     .       .       .       .   no
 C6      C7      C8      C9        -159.6(5)     .       .       .       .   no
 C11     C7      C8      C9         -32.9(5)     .       .       .       .   no
 C6      C7      C11     C10        175.5(4)     .       .       .       .   no
 C6      C7      C11     C12        -62.7(4)     .       .       .       .   no
 C6      C7      C11     C19         60.9(5)     .       .       .       .   no
 C8      C7      C11     C10         45.2(4)     .       .       .       .   no
 C8      C7      C11     C12        167.0(3)     .       .       .       .   no
 C8      C7      C11     C19        -69.4(4)     .       .       .       .   no
 C7      C8      C9      C10          7.0(6)     .       .       .       .   no
 C8      C9      C10     O3        -100.2(6)     .       .       .       .   no
 C8      C9      C10     C11         20.7(6)     .       .       .       .   no
 C8      C9      C10     C20        142.8(4)     .       .       .       .   no
 O3      C10     C11     C7          80.5(5)     .       .       .       .   no
 O3      C10     C11     C12        -34.7(6)     .       .       .       .   no
 O3      C10     C11     C19       -161.7(4)     .       .       .       .   no
 C9      C10     C11     C7         -39.9(5)     .       .       .       .   no
 C9      C10     C11     C12       -155.1(5)     .       .       .       .   no
 C9      C10     C11     C19         77.9(5)     .       .       .       .   no
 C20     C10     C11     C7        -163.0(4)     .       .       .       .   no
 C20     C10     C11     C12         81.8(5)     .       .       .       .   no
 C20     C10     C11     C19        -45.2(4)     .       .       .       .   no
 O3      C10     C20     O4        -138.9(5)     .       .       .       .   no
 O3      C10     C20     C21         43.8(5)     .       .       .       .   no
 C9      C10     C20     O4         -17.4(6)     .       .       .       .   no
 C9      C10     C20     C21        165.3(4)     .       .       .       .   no
 C11     C10     C20     O4          99.7(5)     .       .       .       .   no
 C11     C10     C20     C21        -77.7(5)     .       .       .       .   no
 C7      C11     C12     C13         55.6(4)     .       .       .       .   no
 C10     C11     C12     C13        166.7(4)     .       .       .       .   no
 C19     C11     C12     C13        -68.2(6)     .       .       .       .   no
 C11     C12     C13     O2          73.4(5)     .       .       .       .   no
 C11     C12     C13     C14        -49.8(6)     .       .       .       .   no
 O2      C13     C14     C6         -77.6(4)     .       .       .       .   no
 O2      C13     C14     C15         52.9(5)     .       .       .       .   no
 C12     C13     C14     C6          47.3(5)     .       .       .       .   no
 C12     C13     C14     C15        177.8(4)     .       .       .       .   no
 C6      C14     C15     C3         -53.5(5)     .       .       .       .   no
 C6      C14     C15     C16       -175.6(4)     .       .       .       .   no
 C6      C14     C15     C18         65.1(4)     .       .       .       .   no
 C13     C14     C15     C3         175.3(4)     .       .       .       .   no
 C13     C14     C15     C16         53.1(5)     .       .       .       .   no
 C13     C14     C15     C18        -66.1(5)     .       .       .       .   no
 C3      C15     C16     C17          4.6(6)     .       .       .       .   no
 C14     C15     C16     C17        124.2(5)     .       .       .       .   no
 C18     C15     C16     C17       -111.9(5)     .       .       .       .   no
 C15     C16     C17     C1           0.0(8)     .       .       .       .   no
 O4      C20     C21     O5           5.5(7)     .       .       .       .   no
 C10     C20     C21     O5        -177.1(4)     .       .       .       .   no
 
loop_
_geom_contact_atom_site_label_1
_geom_contact_atom_site_label_2
_geom_contact_distance
_geom_contact_site_symmetry_1
_geom_contact_site_symmetry_2
_geom_contact_publ_flag
 O1      C21        3.419(9)                     .     1_556                 no
 O1      O3         2.764(9)                     .     2_747                 no
 O2      C19        2.987(6)                     .       .                   no
 O2      C16        3.359(9)                     .       .                   no
 O2      C20        3.310(6)                     .     2_746                 no
 O2      C21        3.347(6)                     .     2_746                 no
 O2      C18        2.805(8)                     .       .                   no
 O2      O3         2.914(8)                     .     2_746                 no
 O3      O2         2.914(8)                     .     2_756                 no
 O3      C8         3.406(9)                     .     1_655                 no
 O3      O1         2.764(9)                     .     2_757                 no
 O4      C19        3.175(8)                     .       .                   no
 O4      C18        3.142(8)                     .     2_656                 no
 O4      O5         2.621(9)                     .       .                   no
 O5      C2         3.309(8)                     .     1_554                 no
 O5      C4         3.353(9)                     .     1_654                 no
 O5      C1         3.249(8)                     .     1_554                 no
 O5      O4         2.621(9)                     .       .                   no
 O1      H19B       2.747(9)                     .     1_556                 no
 O1      H31        1.972(9)                     .     2_747                 no
 O1      H21B       2.757(9)                     .     1_556                 no
 O2      H18B       2.356(8)                     .       .                   no
 O2      H9A        2.824(9)                     .     2_646                 no
 O2      H6         2.910(7)                     .       .                   no
 O2      H21A       2.710(8)                     .     2_746                 no
 O2      H18C       2.817(9)                     .       .                   no
 O2      H19A       2.448(7)                     .       .                   no
 O3      H8B        2.503(9)                     .     1_655                 no
 O3      H12A       2.504(8)                     .       .                   no
 O3      H21A       2.475(9)                     .       .                   no
 O3      H7         2.686(9)                     .       .                   no
 O3      H21        2.139(8)                     .     2_756                 no
 O4      H18B       2.796(9)                     .     2_656                 no
 O4      H19C       2.812(8)                     .       .                   no
 O4      H2         2.819(8)                     .     1_554                 no
 O4      H5         2.158(9)                     .       .                   no
 O4      H9A        2.419(9)                     .       .                   no
 O5      H4A       2.534(10)                     .     1_654                 no
 O5      H16        2.848(8)                     .     2_756                 no
 C1      O5         3.249(8)                     .     1_556                 no
 C2      O5         3.309(8)                     .     1_556                 no
 C4      O5         3.353(9)                     .     1_456                 no
 C8      O3         3.406(9)                     .     1_455                 no
 C12     C21        3.491(9)                     .       .                   no
 C16     O2         3.359(9)                     .       .                   no
 C18     O4         3.142(8)                     .     2_646                 no
 C18     O2         2.805(8)                     .       .                   no
 C19     O4         3.175(8)                     .       .                   no
 C19     O2         2.987(6)                     .       .                   no
 C20     O2         3.310(6)                     .     2_756                 no
 C21     C12        3.491(9)                     .       .                   no
 C21     O2         3.347(6)                     .     2_756                 no
 C21     O1         3.419(9)                     .     1_554                 no
 C1      H31        3.059(8)                     .     2_747                 no
 C1      H5         3.068(8)                     .     1_556                 no
 C2      H5         2.781(8)                     .     1_556                 no
 C4      H18C       2.883(8)                     .       .                   no
 C5      H8A        3.010(8)                     .       .                   no
 C6      H19A       2.696(8)                     .       .                   no
 C6      H18C       2.781(7)                     .       .                   no
 C7      H31        2.830(8)                     .       .                   no
 C8      H5A       2.791(11)                     .       .                   no
 C8      H31       3.084(10)                     .       .                   no
 C8      H19C       2.715(9)                     .       .                   no
 C9      H19C       2.642(8)                     .       .                   no
 C10     H21        2.961(8)                     .     2_756                 no
 C12     H21B       2.899(9)                     .       .                   no
 C13     H18B       3.094(8)                     .       .                   no
 C13     H7         3.098(3)                     .       .                   no
 C13     H16        2.714(8)                     .       .                   no
 C13     H19A       2.886(8)                     .       .                   no
 C16     H13        2.672(9)                     .       .                   no
 C18     H4B        2.773(8)                     .       .                   no
 C18     H6         2.883(7)                     .       .                   no
 C19     H6         2.716(8)                     .       .                   no
 C19     H8B        2.896(8)                     .       .                   no
 C19     H21        2.998(6)                     .       .                   no
 C19     H9A        3.069(7)                     .       .                   no
 C20     H21        2.935(7)                     .     2_756                 no
 C20     H19C       2.824(7)                     .       .                   no
 C20     H19B       2.684(6)                     .       .                   no
 C21     H12B       2.963(8)                     .       .                   no
 H2      O4         2.819(8)                     .     1_556                 no
 H2      H4A        2.314(9)                     .       .                   no
 H4A     O5        2.534(10)                     .     1_456                 no
 H4A     H2         2.314(9)                     .       .                   no
 H4B     C18        2.773(8)                     .       .                   no
 H4B     H18C       2.394(9)                     .       .                   no
 H5      O4         2.158(9)                     .       .                   no
 H5      C1         3.068(8)                     .     1_554                 no
 H5      C2         2.781(8)                     .     1_554                 no
 H5A     C8        2.791(11)                     .       .                   no
 H5A     H8A       2.593(10)                     .       .                   no
 H5B     H7        2.490(10)                     .       .                   no
 H5B     H14        2.506(7)                     .       .                   no
 H5B     H17       2.451(10)                     .     2_757                 no
 H5B     H18A       2.523(7)                     .     2_657                 no
 H6      O2         2.910(7)                     .       .                   no
 H6      C18        2.883(7)                     .       .                   no
 H6      C19        2.716(8)                     .       .                   no
 H6      H18C       2.227(8)                     .       .                   no
 H6      H19A       2.100(8)                     .       .                   no
 H7      O3         2.686(9)                     .       .                   no
 H7      C13        3.098(3)                     .       .                   no
 H7      H5B       2.490(10)                     .       .                   no
 H7      H12A       2.410(7)                     .       .                   no
 H7      H14        2.381(6)                     .       .                   no
 H7      H31        2.295(9)                     .       .                   no
 H7      H17        2.547(9)                     .     2_757                 no
 H8A     C5         3.010(8)                     .       .                   no
 H8A     H5A       2.593(10)                     .       .                   no
 H8B     O3         2.503(9)                     .     1_455                 no
 H8B     C19        2.896(8)                     .       .                   no
 H8B     H19C      2.424(10)                     .       .                   no
 H8B     H31       2.531(10)                     .     1_455                 no
 H9A     O4         2.419(9)                     .       .                   no
 H9A     C19        3.069(7)                     .       .                   no
 H9A     H19C       2.406(8)                     .       .                   no
 H9A     O2         2.824(9)                     .     2_656                 no
 H9B     H31       2.289(11)                     .       .                   no
 H9B     H12B       2.545(8)                     .     2_756                 no
 H12A    O3         2.504(8)                     .       .                   no
 H12A    H7         2.410(7)                     .       .                   no
 H12B    C21        2.963(8)                     .       .                   no
 H12B    H19B       2.455(9)                     .       .                   no
 H12B    H21        2.300(7)                     .       .                   no
 H12B    H21B       2.187(9)                     .       .                   no
 H12B    H9B        2.545(8)                     .     2_746                 no
 H13     C16        2.672(9)                     .       .                   no
 H13     H16        2.192(9)                     .       .                   no
 H14     H5B        2.506(7)                     .       .                   no
 H14     H7         2.381(6)                     .       .                   no
 H16     C13        2.714(8)                     .       .                   no
 H16     H13        2.192(9)                     .       .                   no
 H16     H18B      2.486(11)                     .       .                   no
 H16     O5         2.848(8)                     .     2_746                 no
 H17     H5B       2.451(10)                     .     2_747                 no
 H17     H7         2.547(9)                     .     2_747                 no
 H18A    H5B        2.523(7)                     .     2_647                 no
 H18B    O2         2.356(8)                     .       .                   no
 H18B    C13        3.094(8)                     .       .                   no
 H18B    H16       2.486(11)                     .       .                   no
 H18B    O4         2.796(9)                     .     2_646                 no
 H18C    O2         2.817(9)                     .       .                   no
 H18C    C4         2.883(8)                     .       .                   no
 H18C    C6         2.781(7)                     .       .                   no
 H18C    H4B        2.394(9)                     .       .                   no
 H18C    H6         2.227(8)                     .       .                   no
 H19A    O2         2.448(7)                     .       .                   no
 H19A    C6         2.696(8)                     .       .                   no
 H19A    C13        2.886(8)                     .       .                   no
 H19A    H6         2.100(8)                     .       .                   no
 H19B    O1         2.747(9)                     .     1_554                 no
 H19B    C20        2.684(6)                     .       .                   no
 H19B    H12B       2.455(9)                     .       .                   no
 H19C    O4         2.812(8)                     .       .                   no
 H19C    C8         2.715(9)                     .       .                   no
 H19C    C9         2.642(8)                     .       .                   no
 H19C    C20        2.824(7)                     .       .                   no
 H19C    H8B       2.424(10)                     .       .                   no
 H19C    H9A        2.406(8)                     .       .                   no
 H19C    H21A       2.474(8)                     .     1_455                 no
 H21     C19        2.998(6)                     .       .                   no
 H21     H12B       2.300(7)                     .       .                   no
 H21     O3         2.139(8)                     .     2_746                 no
 H21     C10        2.961(8)                     .     2_746                 no
 H21     C20        2.935(7)                     .     2_746                 no
 H21     H21A       2.547(8)                     .     2_746                 no
 H21     H31        2.462(9)                     .     2_746                 no
 H21A    O3         2.475(9)                     .       .                   no
 H21A    H19C       2.474(8)                     .     1_655                 no
 H21A    O2         2.710(8)                     .     2_756                 no
 H21A    H21        2.547(8)                     .     2_756                 no
 H21B    O1         2.757(9)                     .     1_554                 no
 H21B    C12        2.899(9)                     .       .                   no
 H21B    H12B       2.187(9)                     .       .                   no
 H31     C7         2.830(8)                     .       .                   no
 H31     C8        3.084(10)                     .       .                   no
 H31     H7         2.295(9)                     .       .                   no
 H31     H8B       2.531(10)                     .     1_655                 no
 H31     H9B       2.289(11)                     .       .                   no
 H31     O1         1.972(9)                     .     2_757                 no
 H31     C1         3.059(8)                     .     2_757                 no
 H31     H21        2.462(9)                     .     2_756                 no
 
loop_
_geom_hbond_atom_site_label_D
_geom_hbond_atom_site_label_H
_geom_hbond_atom_site_label_A
_geom_hbond_distance_DH
_geom_hbond_distance_HA
_geom_hbond_distance_DA
_geom_hbond_angle_DHA
_geom_hbond_site_symmetry_A
_geom_hbond_publ_flag
#
#D   H   A   D - H  H...A   D...A    D - H...A  symm(A)
#
O5      H5      O4       0.830(10)   2.158(9)   2.621(9)   115.2(7)     .   yes
O2      H21     O3        0.830(9)   2.139(8)   2.914(8)   155.3(4)   2_746 yes
O3      H31     O1        0.830(9)   1.972(9)   2.764(9)   159.2(8)   2_757 yes
C4      H4A     O5        0.980(9)  2.534(10)   3.353(9)   140.9(7)   1_456 yes
C8      H8B     O3        0.980(9)   2.503(9)   3.406(9)   153.1(6)   1_455 yes
C9      H9A     O4       0.980(10)   2.419(9)   2.850(9)   106.0(6)     .   yes
C12     H12A    O3        0.981(6)   2.504(8)   2.907(6)   104.4(5)     .   yes
C18     H18B    O2        0.970(7)   2.356(8)   2.805(8)   107.6(4)     .   yes
C19     H19A    O2        0.970(7)   2.448(7)   2.987(6)   114.7(5)     .   yes

_vrf_ATOM007-PLAT201
;
PROBLEM: _atom_site_aniso_label is missing and isotropic non H-atoms in main residues
REPLY : Powder Rigid body Global Isotropic Factor
;
_vrf_PLAT029-PLAT183
;
PROBLEM: _diffrn_measured_fraction_theta_full Low ....... 0.000.
REPLY : Powder diffraction - no monocrystal
;
_vrf_PLAT035
;
PROBLEM: _chemical_absolute_configuration info and No Flack Parameter Given.
REPLY: Powder Diffraction
;
